# Supplementary material
Source: PubMed Central journal article supplement (PMC3195609)

## SUPPLEMENTARY DATA

### FIGURE LEGENDS

**FIGURE 1. Model of PKC-BetaII based on the published Crystal structure (42).** Left: shows intramolecular contacts of the region containing the NLS/PPxxP motif (orange) within the catalytic domain (gray) with C2-domain (purple). Right: 90° rotation of the model around its Y-axis.

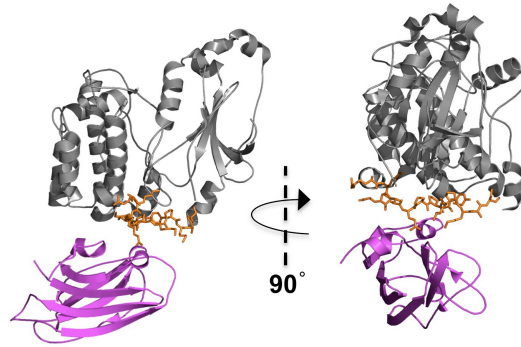

Supplement: supp_M111.255950_jbc.M111.255950-1.pdf [file supp_M111.255950_jbc.M111.255950-1.pdf]
